# Supplementary material for: Gas adsorption efficacy of graphene sheets functionalised with carboxyl, hydroxyl and epoxy groups in conjunction with Stone–Thrower–Wales (STW) and inverse Stone–Thrower–Wales (ISTW) defects
Source: Royal Society of Chemistry journal article supplement (doi:10.1039/c7cp06900f), 2017-01-01
Supplement: c7cp06900f1.pdf [file c7cp06900f1.pdf]

**Supplementary Information**

for

**Gas adsorption efficacy of Graphene sheet Functionalised with Carboxyl, Hydroxyl and Epoxy groups in conjunction with Stone-Thrower wales (STW) and Inverse Stone-Thrower Wales (ISTW) defect**

Murugan Lalitha, Senthilkumar Lakshmipathi\*  
Department of Physics, Bharathiar University, Coimbatore-641 046.

*\*Corresponding Author*

Senthilkumar Lakshmipathi: Email: [lsenthilkumar@buc.edu.in](mailto:lsenthilkumar@buc.edu.in).

Tel.:+91 9443702753

## Adsorption on single-side functionalised sheets:

**Table S1:** Optimized C-C bond length in functionalised pristine and defective sheets.

|              | Single side functionalization |                      |            |                             |                      |             |                     |                      |
|--------------|-------------------------------|----------------------|------------|-----------------------------|----------------------|-------------|---------------------|----------------------|
|              | Central C-C bond length (Å)   | C-C-C bond angle (°) |            | Central C-C bond length (Å) | C-C-C bond angle (°) |             | C-C bond length (Å) | C-C-C bond angle (°) |
| Pristine     | 1.39                          | 120                  | STW        | 1.33                        | 125.5                | ISTW        | 1.36                | 109.2                |
| Pris.+COOH   | 1.51                          | 112.7                | STW+COOH   | 1.46                        | 114.5                | ISTW+COOH   | 1.53                | 101.8                |
| Pris.+OH     | 1.50                          | 112.7                | STW+OH     | 1.46                        | 114.0                | ISTW+OH     | 1.53                | 101.8                |
| Pris.+ C-O-C | 1.49                          | 118.2                | STW+ C-O-C | 1.44                        | 123.7                | ISTW+ C-O-C | 1.47                | 106.9                |

**Table S2: Mulliken Charges accumulated on the gas molecule in the adsorbed complexes.**

| Complex         | Mulliken charges on gas molecule (e) |                |                |                 |         |                |                  |
|-----------------|--------------------------------------|----------------|----------------|-----------------|---------|----------------|------------------|
|                 | CO <sub>2</sub>                      | H <sub>2</sub> | N <sub>2</sub> | CH <sub>4</sub> | HF      | O <sub>2</sub> | H <sub>2</sub> O |
| Pristine sheet  | 0.0118                               | 0.0044         | 0.0029         | 0.0101          | 0.0127  | -0.0515        | 0.0170           |
| Pristine+COOH   | 0.0046                               | -0.0067        | 0.0149         | -0.0169         | -0.0163 | 0.0155         | 0.0402           |
| Pristine+OH     | -0.0051                              | -0.0153        | 0.0058         | -0.0068         | -0.0314 | -0.2927        | -0.0168          |
| Pristine+ C-O-C | -0.0011                              | -0.0102        | 0.0020         | -0.0075         | -0.0250 | 0.0122         | -0.0058          |
| STW sheet       | 0.0115                               | 0.0029         | 0.0031         | 0.0084          | 0.0076  | -0.0677        | 0.0184           |
| STW+COOH        | 0.0042                               | -0.0065        | 0.0146         | -0.0157         | -0.0162 | 0.0154         | 0.0396           |
| STW+OH          | -0.0030                              | -0.0209        | 0.0009         | 0.0057          | 0.0378  | 0.0137         | 0.0672           |
| STW+ C-O-C      | -0.0037                              | -0.0156        | 0.0013         | -0.0094         | -0.0238 | 0.0110         | -0.0092          |
| ISTW sheet      | 0.0075                               | -0.0018        | -0.0584        | 0.0029          | 0.0005  | -0.1628        | 0.0120           |
| ISTW+COOH       | 0.0042                               | -0.0076        | 0.0147         | -0.0172         | -0.0169 | 0.0107         | 0.0382           |
| ISTW+OH         | -0.0050                              | -0.0205        | 0.0001         | -0.0162         | -0.0281 | 0.0115         | 0.0677           |
| ISTW+ C-O-C     | -0.0008                              | -0.0118        | 0.0031         | -0.0005         | -0.0277 | 0.0069         | -0.0051          |

**Table S3: Adsorptivity of the defect**

| Gas              | Adsorptivity of the defect |                      |                          |                      |                    |                       |
|------------------|----------------------------|----------------------|--------------------------|----------------------|--------------------|-----------------------|
|                  | STW Def-Perfect (COOH)     | STW Def-Perfect(OH)  | STW Def-Perfect (C-O-C)  | STW Def/Perf (COOH)  | STW Def/Perf (OH)  | STW Def/Perf (C-O-C)  |
| CO <sub>2</sub>  | 0.002                      | 0.002                | 0.011                    | 0.992                | 0.993              | 0.957                 |
| H <sub>2</sub>   | -0.001                     | 0.008                | 0.001                    | 1.014                | 0.929              | 0.989                 |
| N <sub>2</sub>   | 0                          | 0.036                | 0                        | 1                    | 0.808              | 1                     |
| CH <sub>4</sub>  | 0                          | 0.022                | 0.006                    | 1                    | 0.907              | 0.972                 |
| HF               | -0.001                     | 0.183                | 0.015                    | 1.001                | 0.687              | 0.971                 |
| O <sub>2</sub>   | 0                          | -1.188               | 0.017                    | 1                    | 2.833              | 0.900                 |
| H <sub>2</sub> O | 0                          | -0.117               | 0.011                    | 1                    | 1.269              | 0.971                 |
|                  | ISTW Def-Perfect (COOH)    | ISTW Def-Perfect(OH) | ISTW Def-Perfect (C-O-C) | ISTW Def/Perf (COOH) | ISTW Def/Perf (OH) | ISTW Def/Perf (C-O-C) |
| CO <sub>2</sub>  | 0.006                      | 0.018                | 0.029                    | 0.977                | 0.937              | 0.887                 |
| H <sub>2</sub>   | 0.001                      | 0.019                | 0.012                    | 0.985                | 0.833              | 0.875                 |
| N <sub>2</sub>   | 0.005                      | 0.037                | 0.009                    | 0.958                | 0.803              | 0.933                 |
| CH <sub>4</sub>  | 0.003                      | 0.042                | 0.032                    | 0.975                | 0.824              | 0.851                 |
| HF               | 0                          | 0.043                | 0.028                    | 1                    | 0.926              | 0.945                 |
| O <sub>2</sub>   | 1.589                      | -1.182               | 0.027                    | 0.105                | 2.824              | 0.842                 |
| H <sub>2</sub> O | 0.008                      | -0.111               | 0.027                    | 0.987                | 1.255              | 0.928                 |

**Table S4: Optimized C-C bond length and C-C-C bond angle in bi-functionalised defective sheets.**

|            | Bi-functionalization |                                   |                      |             |       |                             |                      |
|------------|----------------------|-----------------------------------|----------------------|-------------|-------|-----------------------------|----------------------|
|            |                      | Central C-C bond length (C-O) (Å) | C-C-C bond angle (°) |             |       | Central C-C bond length (Å) | C-C-C bond angle (°) |
| STW        | -                    | 1.33                              | 125.56               | ISTW        | -     | 1.36                        | 109.27               |
| STW+2COOH  | Above                | 1.52                              | 118.39               | ISTW+2COOH  | Above | 1.59                        | 103.45               |
|            | Below                | 1.52                              | 112.61               |             | Below | 1.51                        | 103.78, 98.47        |
| STW+2OH    | Above                | 1.53                              | 118.38               | ISTW+2OH    | Above | 1.58                        | 104.38, 103.86       |
|            | Below                | 1.50                              | 111.74               |             | Below | 1.53                        | 103.70, 97.23        |
| STW+2C-O-C | Above                | 1.48                              | 121.15               | ISTW+2C-O-C | Above | 1.47                        | 105.22, 108.42       |
|            | Below                | 1.85(1.40)                        | -                    |             | Below | 1.81(1.41)                  | -                    |

**Table S5: Energy Decomposition Analysis performed for N<sub>2</sub>/ISTW sheet using BHand HLYP/TZP with dispersion correction as implemented in Amsterdam Density Functional theory (ADF) package**

| rGO                  | Energy components (in eV) |                    |                   |                    |                  |
|----------------------|---------------------------|--------------------|-------------------|--------------------|------------------|
|                      | $\Delta E_{elstat}$       | $\Delta E_{pauli}$ | $\Delta E_{orb.}$ | $\Delta E_{disp.}$ | $\Delta E_{int}$ |
| N <sub>2</sub> /ISTW | -12.21                    | 33.47              | -21.62            | -0.22              | -0.57            |
